# Supplementary material for: Mutations in the B.1.1.7 SARS-CoV-2 Spike Protein Reduce Receptor-Binding Affinity and Induce a Flexible Link to the Fusion Peptide
Source: MDPI journal article supplement (doi:10.3390/biomedicines9050525), 2021-05-08
Supplement: s1 [file s1]

# **Mutations in the B.1.1.7 SARS-CoV-2 spike protein reduce receptor-binding affinity and induce a flexible link to the fusion peptide**

Eileen Socher, Marcus Conrad, Lukas Heger, Friedrich Paulsen, Heinrich Sticht,  
Friederike Zunke and Philipp Arnold

*Supplementary Materials*

## Supplementary Figures

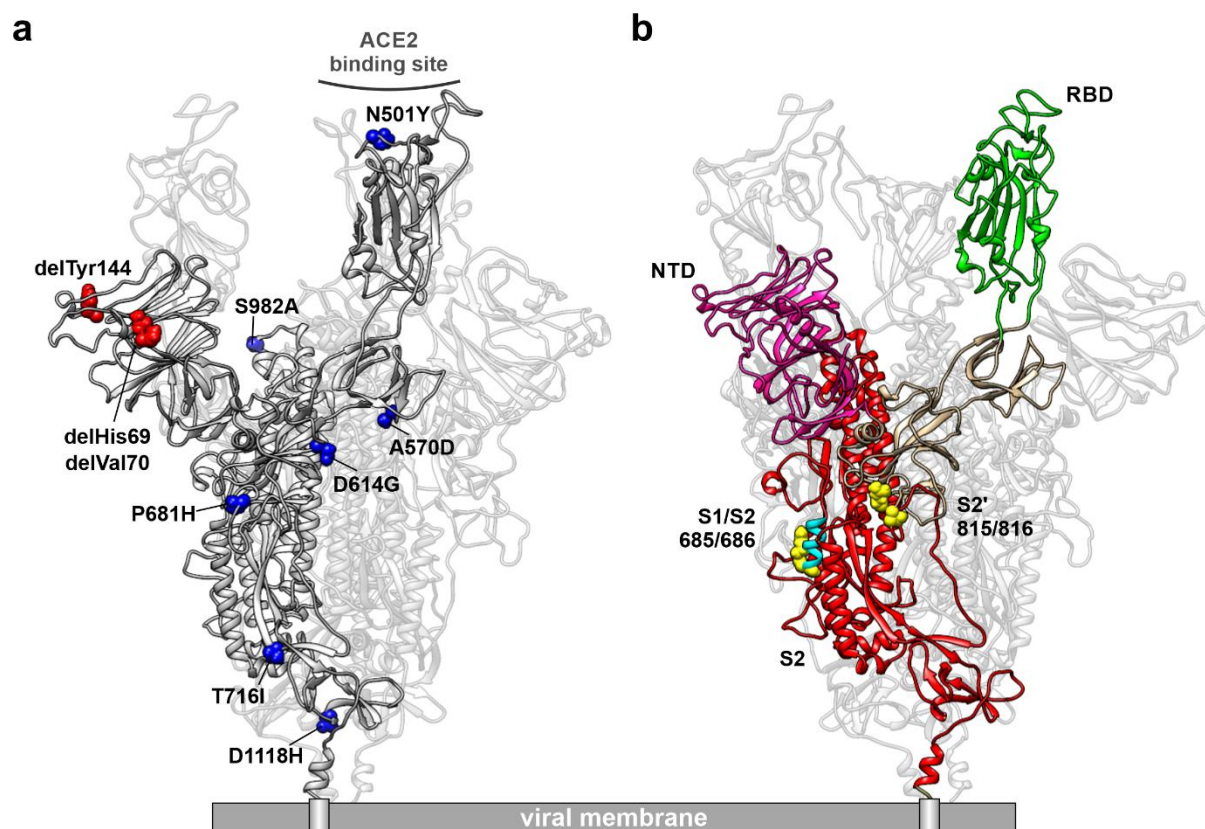

**Figure S1.** Structural representation of the SARS-CoV-2 S protein on the viral surface (**a**) with amino acid residues shown as spheres that are deleted (red) or mutated (blue) in the B.1.1.7 variant and (**b**) with domains highlighted in color as in Figure 1a (N-terminal domain, NTD in pink; receptor-binding domain, RBD in green; S1 region in khaki; S1/S2 and S2' cleavage sites in yellow with amino acids as spheres; fusion peptide in cyan; S2 domain in red).

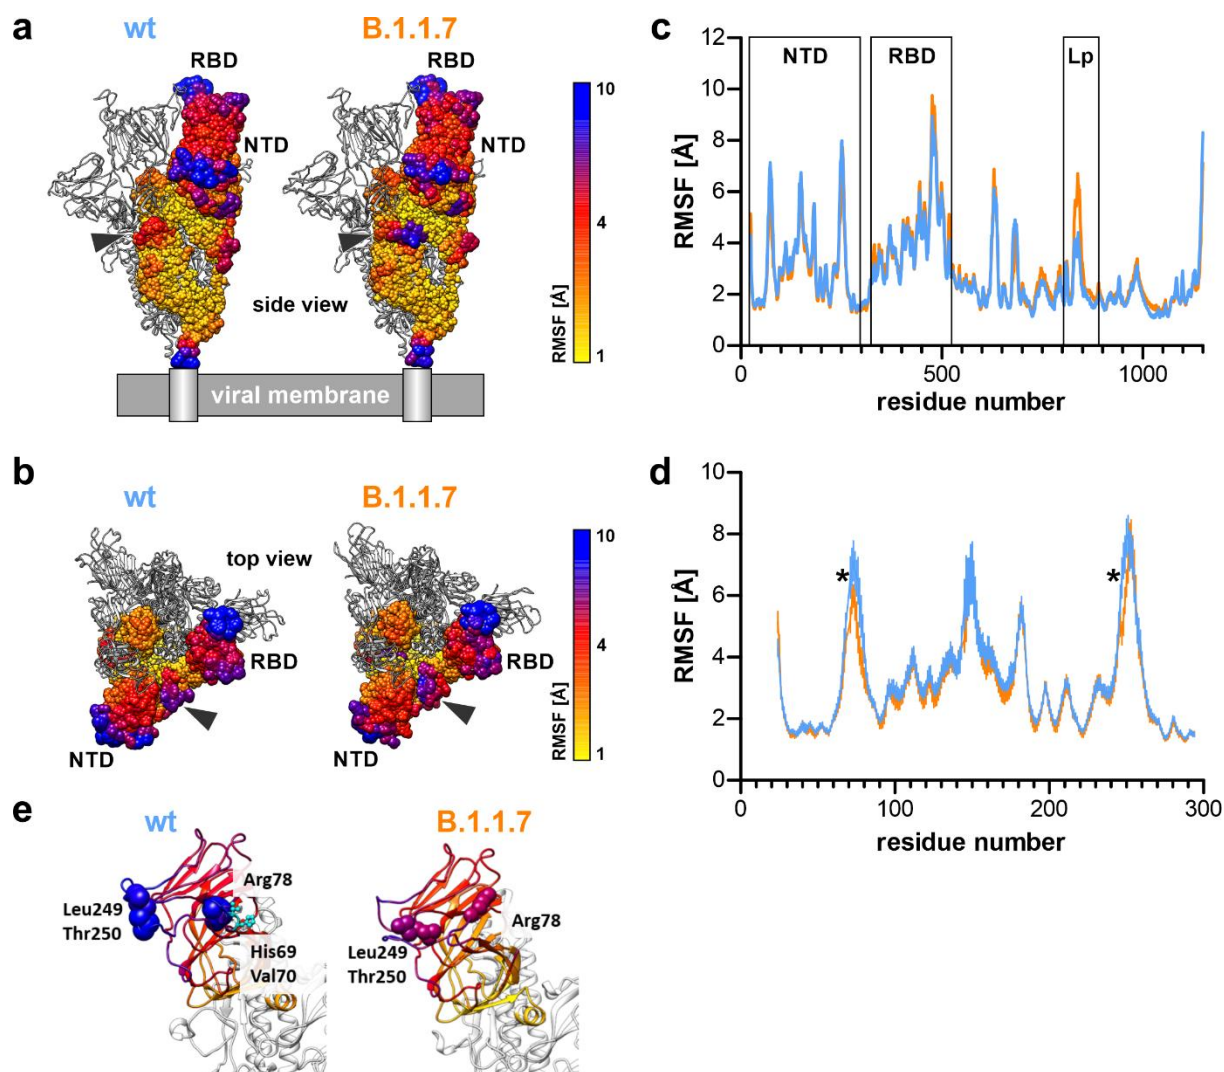

**Figure S2.** Differences of RMSF values between wt and B.1.1.7 spike protein residues. **(a)** Structural representation of the SARS-CoV-2 S protein in side view on the viral surface with residues shown as colored spheres for one subunit according to their RMSF value (grey arrowhead, flexible loop region in B.1.1.7). **(b)** Top view of (a). **(c)** Line plot of RMSF values for calculated averages of six subunits of the wt (blue) and B.1.1.7 (orange) S protein. **(d)** Line plot of RMSF values averaged over six subunits of the N-terminal domain from wt (blue) and B.1.1.7 (orange). Asterisks indicate positions of significant differences (n = 6; two-way ANOVA; significance assumed for p < 0.05; full list in Table S1). **(e)** Structural representation of the N-terminal domain colored according to RMSF values. Residues that differ significantly in RMSF values are represented as spheres. Additionally, His69 and Val70 are shown for wild type (wt) and are missing as del69,70 in B.1.1.7 (n = 6; two-way ANOVA; significance assumed for \*p < 0.05; full list in Table S1). NTD = N-terminal domain, RBD = receptor-binding domain, Lp = loop region around amino acids 836-844.

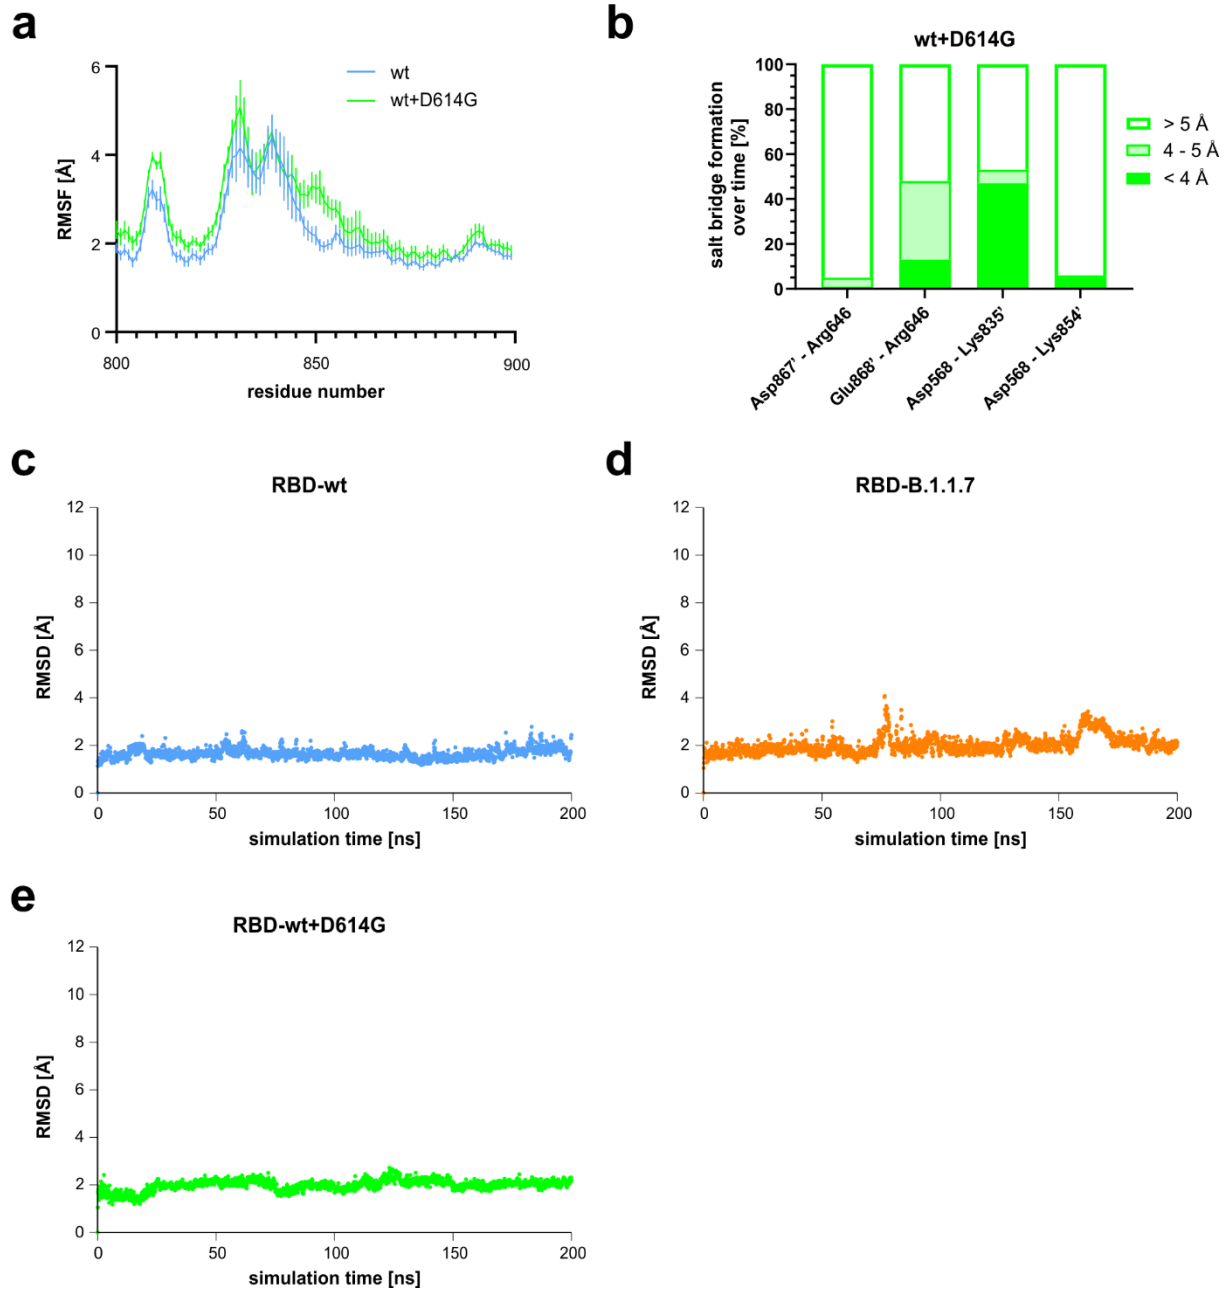

**Figure S3.** Results of the wt+D614G variant and RMSD values the receptor-binding domain (RBD). **(a)** Line plot of root-mean-square fluctuation (RMSF) values for amino acid residues 800 to 900. Averages were calculated for all three trimer subunits and both simulation runs of the wild type (wt, blue) and wt+D614G variant (green). **(b)** Percentage of salt bridge formation over time for four different residue pairs. All residue pairs represent interchain interactions with residues from two different, but directly neighboring chains within the trimeric spike protein. **(c-e)** Conformational stability was measured as root-mean-square deviation (RMSD) values over simulation time for the receptor-binding domain (RBD) of (c) the wild type (d) the B.1.1.7 variant and (e) the wild type with the D614G mutation. One representative plot is shown for wild type spike protein and its variants.

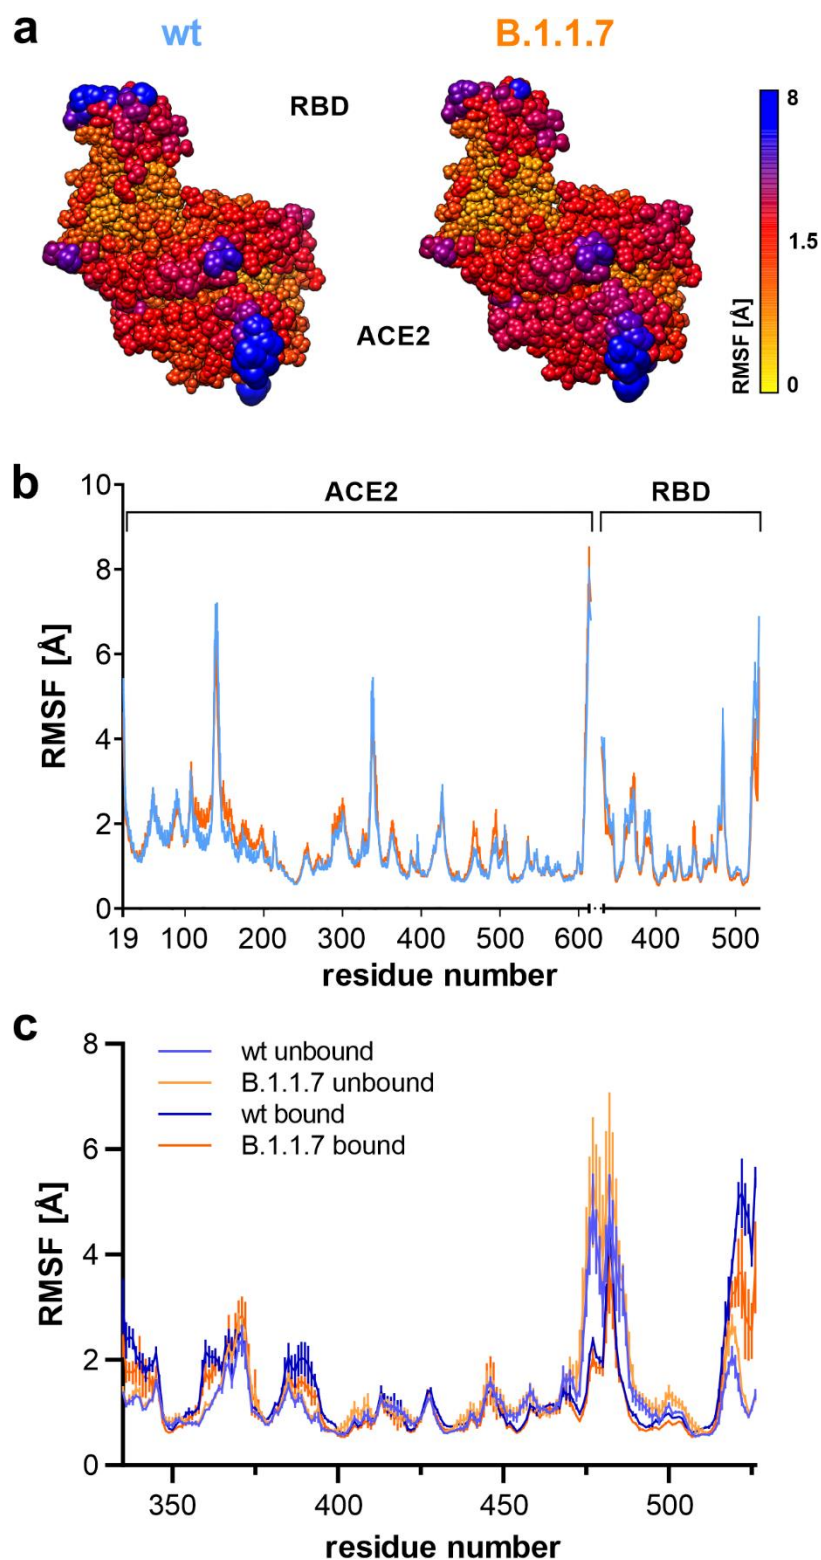

**Figure S4.** Structural flexibility of the receptor-binding domain-ACE2 (RBD-ACE2) complex. **(a)** Residues are colored and shown as spheres of different size according to their individual RMSF values. RBD denotes the receptor-binding domain and ACE2 the angiotensin-converting enzyme 2. **(b)** Line plot of RMSF values averaged over four molecular dynamics (MD) simulation runs for the RBD-ACE2 complex with wild type (wt) in blue and the B.1.1.7 variant in orange. **(c)** Line plot of RMSF values from the RBD in the unbound state (from the S protein trimer MD simulations) and in the bound state to ACE2 (from the RBD-ACE2 complex MD simulations).



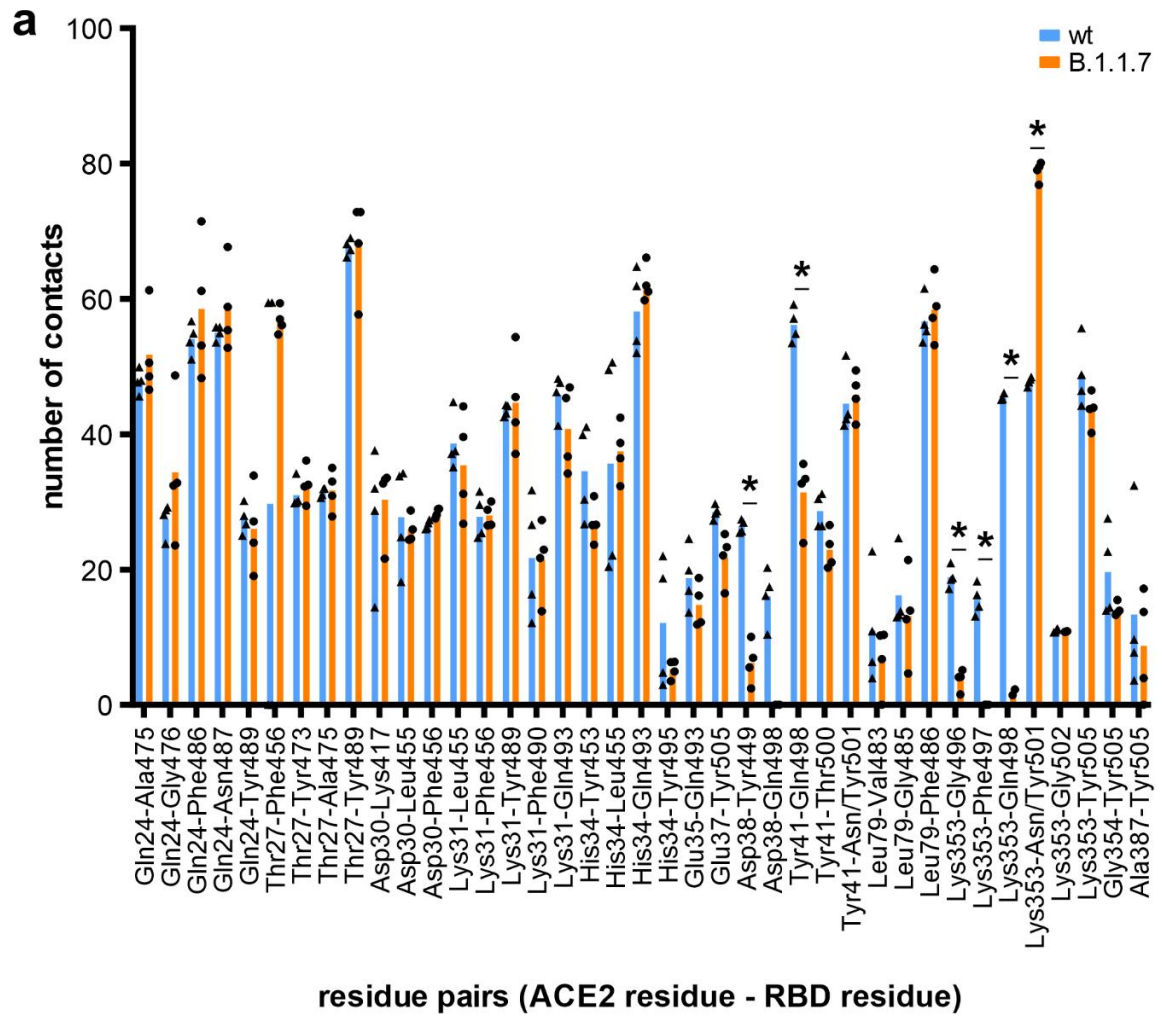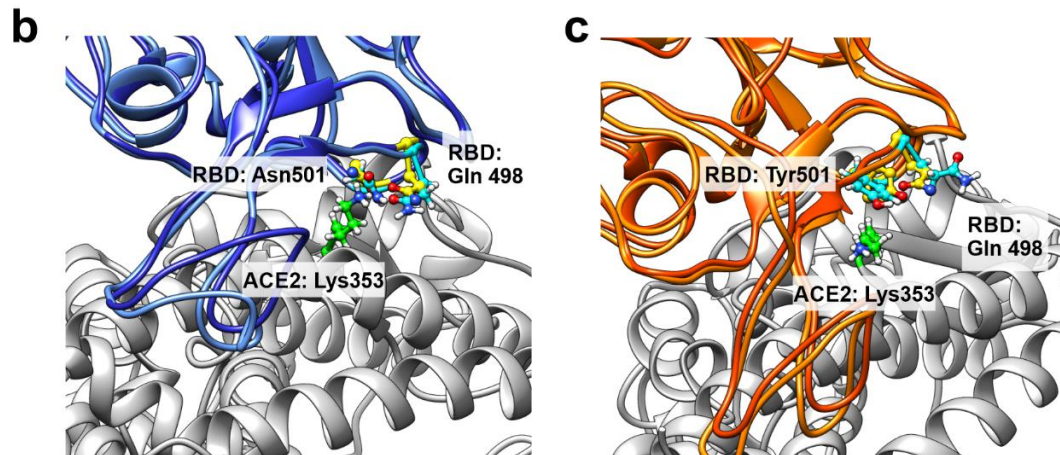

**Figure S5.** Analysis of the interface between ACE2 and the receptor-binding domain (RBD). (a) Average number of contacts for residues from ACE2 and the RBD. Residues were included when they came in closer proximity than 5 Å. Loss of contacts were calculated for glutamine 498 (Gln498) in B.1.1.7, and gain of contacts for the newly inserted tyrosine at position 501 (Tyr501) with lysine 353 (Lys353). Wild type (wt) is shown in blue and B.1.1.7 in orange ( $n = 4$ , two-way ANOVA; statistical significance was assumed for  $*p < 0.05$ ; full list of results in Table S3). (b,c) Structure of the RBD-ACE2 interface with residues asparagine 501 (Asn501; wild type in blue) or tyrosine 501 (Tyr501; B.1.1.7 in orange), glutamine 498 (Gln498) (all from RBD) and lysine 353 (green) from ACE2 shown in ball-and-stick. Yellow residues represent the starting conformation and residues in cyan are representative residue side chain conformations acquired during molecular dynamics simulation.

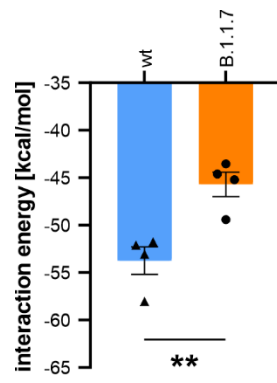

**Figure S6.** Interaction energies of the MM/GBSA analyses for the wild type and the B.1.1.7 receptor-binding domain (RBD) variants complexed with ACE2 (n = 4; two-sided Student's T-test; significance assumed for \*\* =  $p < 0.01$ ).

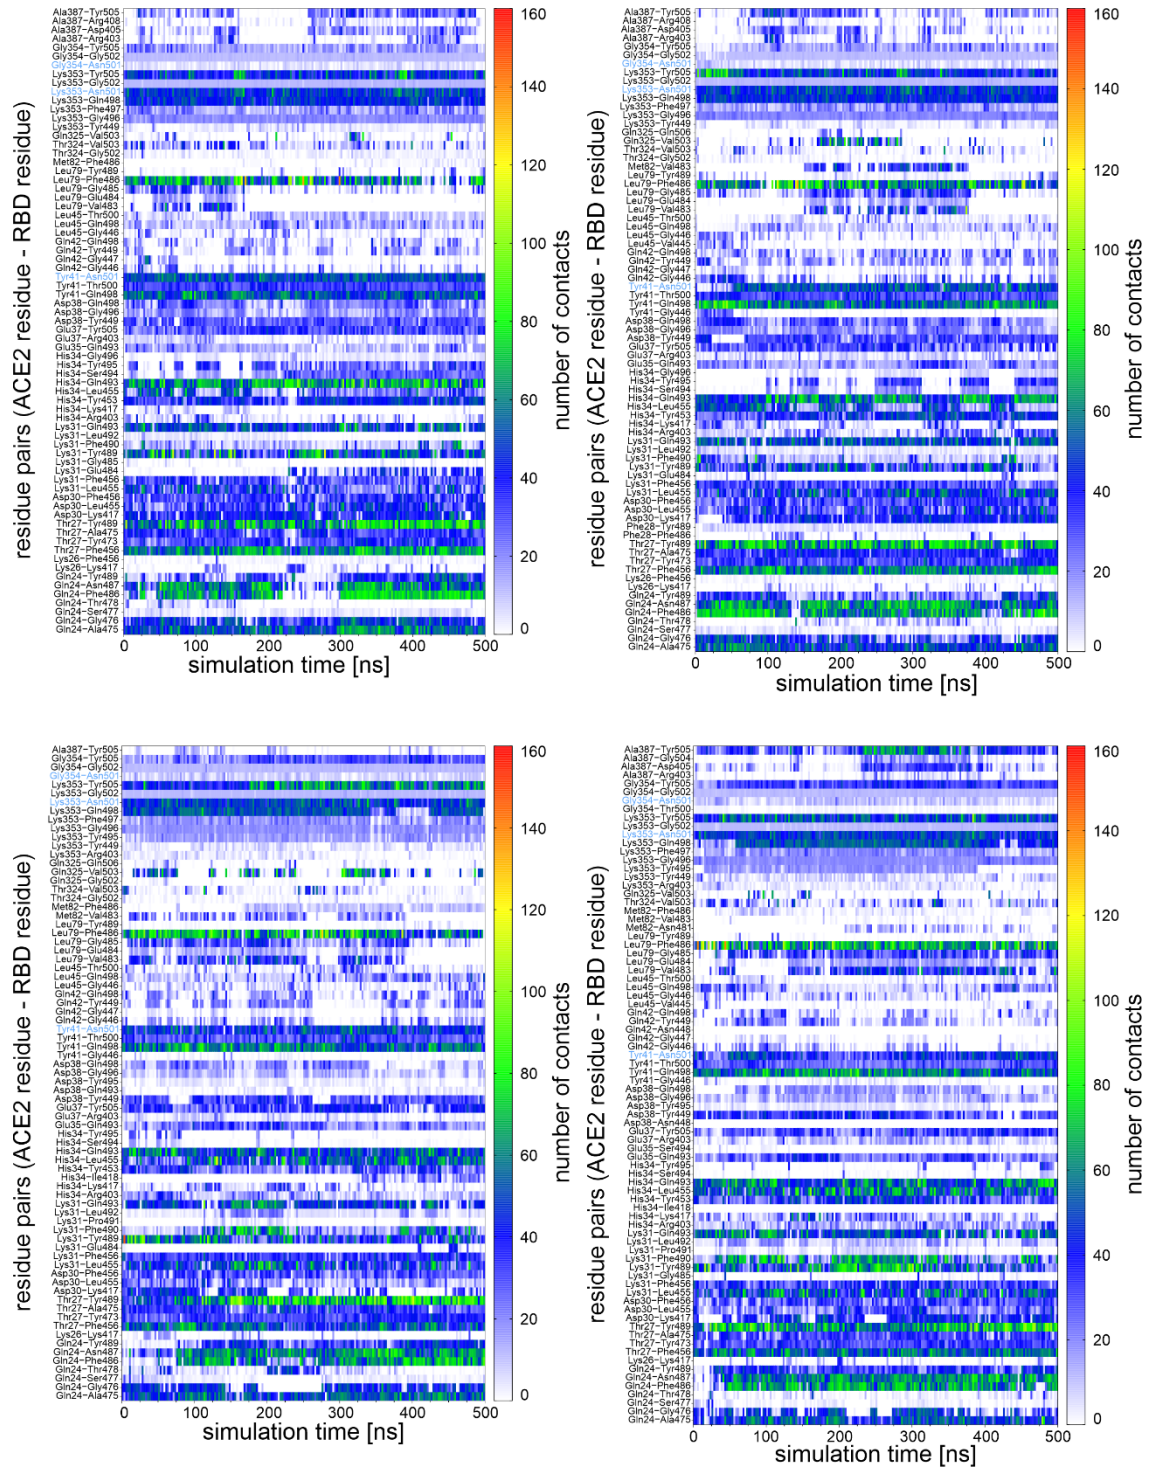

**Figure S7.** Individual intermolecular contact plots for all four molecular dynamics (MD) simulation runs of the wild type RBD-ACE2 complex. The number of contacts, calculated as the number of interresidue atom pairs that are within a maximum distance of 5 Å from each other, was plotted color-coded for intermolecular residue pairs over the simulation time. For instance, the residue pair Lys353-Asn501, with Lys353 expressed on ACE2 and Asn501 expressed on the RBD, has in all four MD simulations a calculated number of contacts between 40 and 60 over the whole simulation time. Residue pairs with asparagine 501 are highlighted in blue.



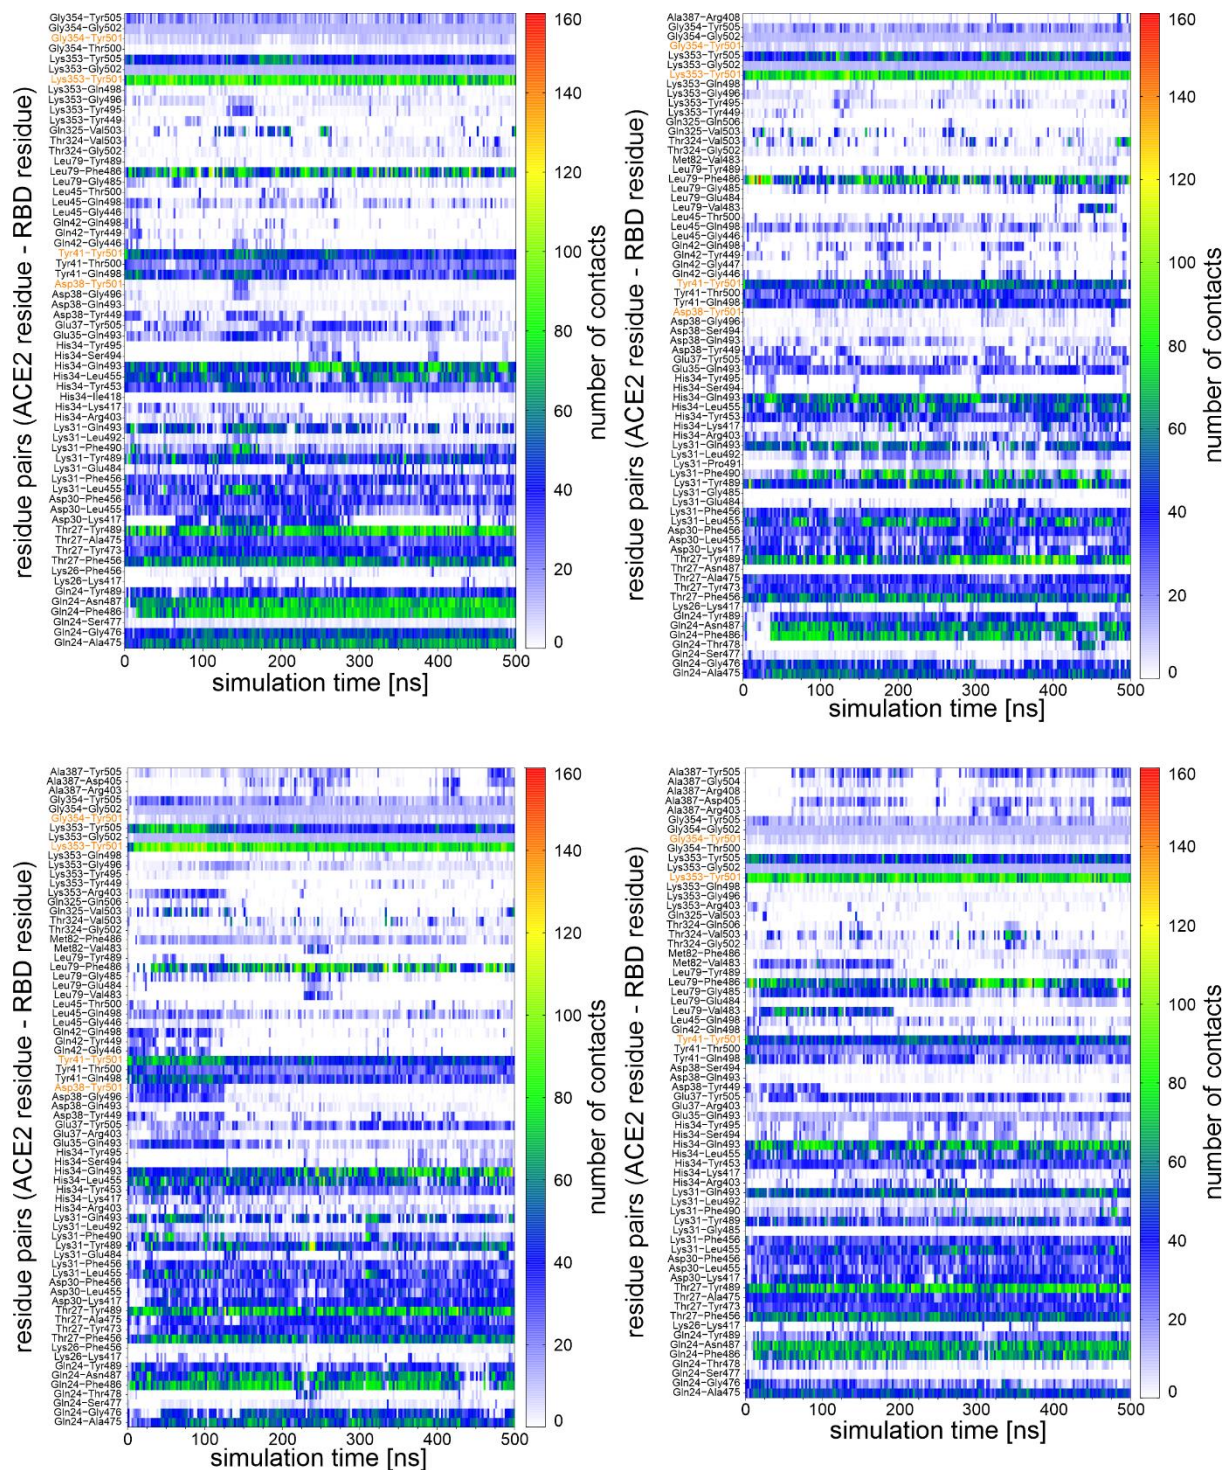

**Figure S8.** Individual intermolecular contact plots for all four molecular dynamics (MD) simulation runs of the B.1.1.7 RBD-ACE2 complex. The number of contacts, calculated as the number of interresidue atom pairs that are within a maximum distance of 5 Å from each other, was plotted color-coded for intermolecular residue pairs over the simulation time. For instance, the residue pair Lys353-Tyr501, with Lys353 expressed on ACE2 and Tyr501 expressed on the mutated RBD, has in all four MD simulations a calculated number of around 80 contacts over the whole simulation time. Residue pairs with mutated tyrosine 501 are highlighted in orange.

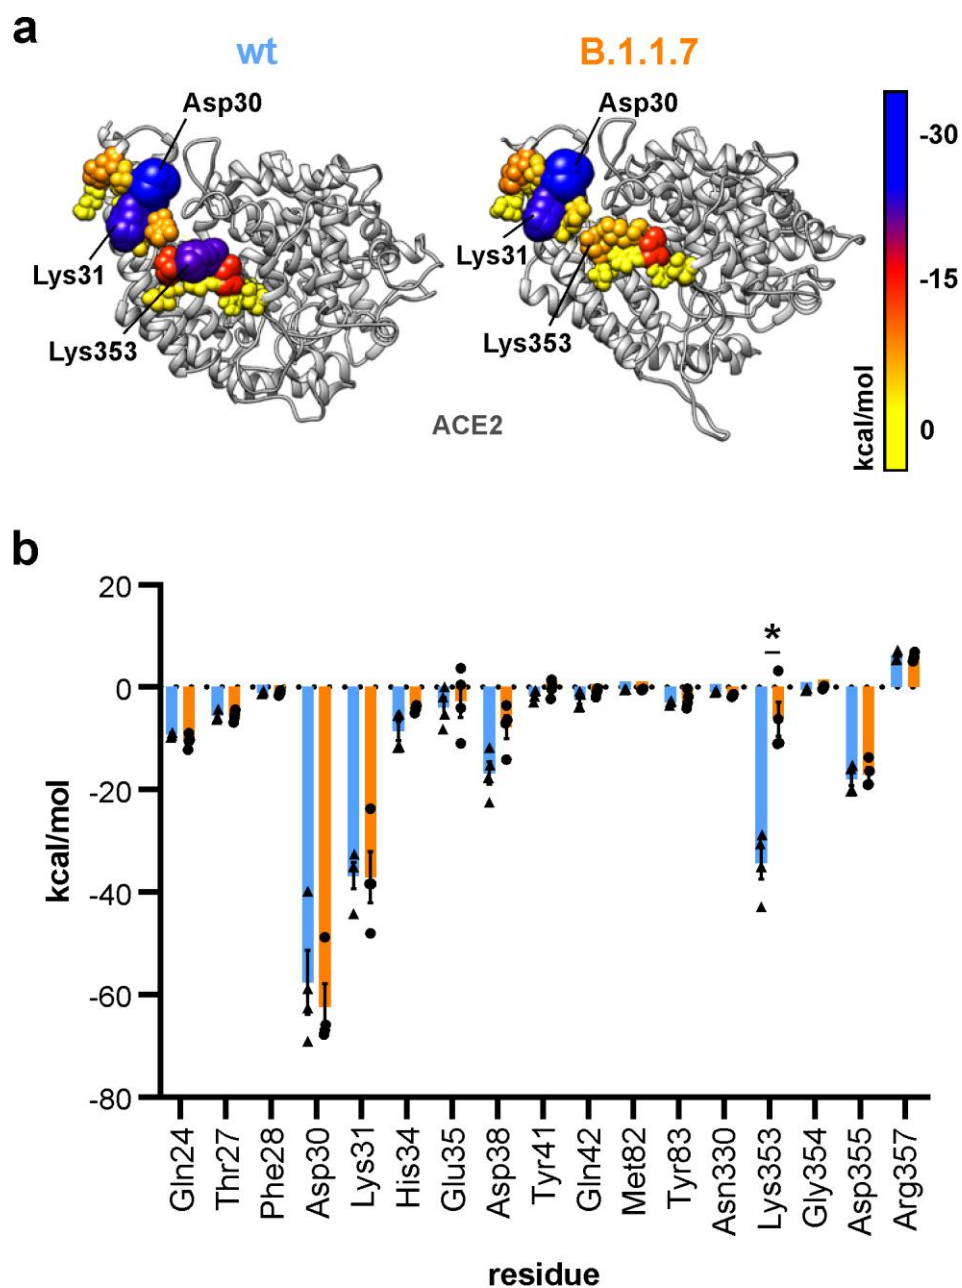

**Figure S9.** Electrostatic affinity shown on the RBD-ACE2 interface for ACE2 residues. (a) Residues in closer contact than 4 Å are shown as spheres of different size and color according to their electrostatic affinity with the RBD. (b) Quantification of the electrostatic linear interaction energy for all residues within a radius of 4 Å around the receptor-binding domain (n = 4; two-way ANOVA; statistical significance was assumed for \*p<0.05; full list of results in Table S5).

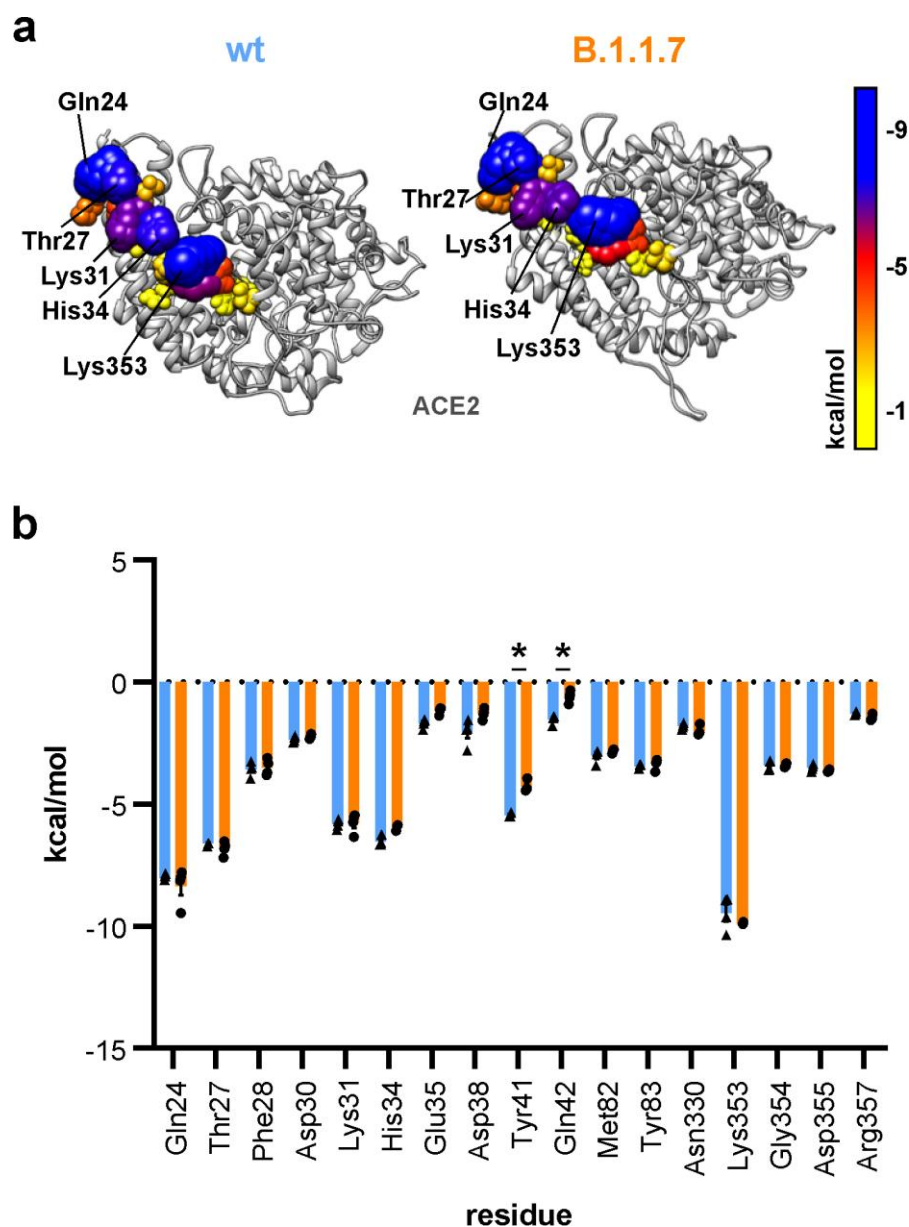

**Figure S10.** Van der Waals linear interaction energy shown on the RBD-ACE2 interface for ACE2 residues. **(a)** Residues in closer contact than 4 Å are shown as spheres of different size and color according to their van der Waals linear interaction energy with the RBD. **(b)** Quantification of the van der Waals linear interaction energy for all residues within a radius of 4 Å around the receptor-binding domain ( $n = 4$ ; two-way ANOVA; statistical significance was assumed for  $*p < 0.05$ ; full list of results in Table S7).

## Supplementary Tables

**Table S1.** Statistical analysis of RMSF plots from wt and B.1.1.7 spike protein residues 26-300 (n =6; two-way ANOVA; significance assumed for \*p<0.05).

| Compare each cell mean with the other cell mean in that row |            |                    |              |         |                  |
|-------------------------------------------------------------|------------|--------------------|--------------|---------|------------------|
| Number of families                                          | 1          |                    |              |         |                  |
| Number of comparisons per family                            | 268        |                    |              |         |                  |
| Alpha                                                       | 0.05       |                    |              |         |                  |
|                                                             |            |                    |              |         |                  |
| Sidak's multiple comparisons test                           | Mean Diff, | 95,00% CI of diff, | Significant? | Summary | Adjusted P Value |
|                                                             |            |                    |              |         |                  |
| residue number                                              |            |                    |              |         |                  |
| 26                                                          | -0.8329    | -2.402 to 0.7364   | No           | ns      | >0.9999          |
| 27                                                          | -0.6585    | -2.228 to 0.9108   | No           | ns      | >0.9999          |
| 28                                                          | 0.008633   | -1.561 to 1.578    | No           | ns      | >0.9999          |
| 29                                                          | 0.07843    | -1.491 to 1.648    | No           | ns      | >0.9999          |
| 30                                                          | 0.1215     | -1.448 to 1.691    | No           | ns      | >0.9999          |
| 31                                                          | 0.1201     | -1.449 to 1.689    | No           | ns      | >0.9999          |
| 32                                                          | 0.09778    | -1.472 to 1.667    | No           | ns      | >0.9999          |
| 33                                                          | 0.1022     | -1.467 to 1.671    | No           | ns      | >0.9999          |
| 34                                                          | 0.09672    | -1.473 to 1.666    | No           | ns      | >0.9999          |
| 35                                                          | 0.1199     | -1.449 to 1.689    | No           | ns      | >0.9999          |
| 36                                                          | 0.1115     | -1.458 to 1.681    | No           | ns      | >0.9999          |
| 37                                                          | 0.1039     | -1.465 to 1.673    | No           | ns      | >0.9999          |
| 38                                                          | 0.05178    | -1.518 to 1.621    | No           | ns      | >0.9999          |
| 39                                                          | 0.01918    | -1.550 to 1.588    | No           | ns      | >0.9999          |
| 40                                                          | 0.01925    | -1.550 to 1.589    | No           | ns      | >0.9999          |
| 41                                                          | 0.01545    | -1.554 to 1.585    | No           | ns      | >0.9999          |
| 42                                                          | -0.02265   | -1.592 to 1.547    | No           | ns      | >0.9999          |
| 43                                                          | 0.001033   | -1.568 to 1.570    | No           | ns      | >0.9999          |
| 44                                                          | 0.02818    | -1.541 to 1.597    | No           | ns      | >0.9999          |
| 45                                                          | 0.07722    | -1.492 to 1.647    | No           | ns      | >0.9999          |
| 46                                                          | 0.1215     | -1.448 to 1.691    | No           | ns      | >0.9999          |
| 47                                                          | 0.1766     | -1.393 to 1.746    | No           | ns      | >0.9999          |
| 48                                                          | 0.1580     | -1.411 to 1.727    | No           | ns      | >0.9999          |
| 49                                                          | 0.1641     | -1.405 to 1.733    | No           | ns      | >0.9999          |
| 50                                                          | 0.1397     | -1.430 to 1.709    | No           | ns      | >0.9999          |
| 51                                                          | 0.1227     | -1.447 to 1.692    | No           | ns      | >0.9999          |
| 52                                                          | 0.1026     | -1.467 to 1.672    | No           | ns      | >0.9999          |
| 53                                                          | 0.08602    | -1.483 to 1.655    | No           | ns      | >0.9999          |
| 54                                                          | 0.04920    | -1.520 to 1.619    | No           | ns      | >0.9999          |
| 55                                                          | 0.05165    | -1.518 to 1.621    | No           | ns      | >0.9999          |
| 56                                                          | 0.04797    | -1.521 to 1.617    | No           | ns      | >0.9999          |
| 57                                                          | 0.06490    | -1.504 to 1.634    | No           | ns      | >0.9999          |
| 58                                                          | 0.06837    | -1.501 to 1.638    | No           | ns      | >0.9999          |
| 59                                                          | 0.05853    | -1.511 to 1.628    | No           | ns      | >0.9999          |
| 60                                                          | 0.03623    | -1.533 to 1.606    | No           | ns      | >0.9999          |
| 61                                                          | 0.05272    | -1.517 to 1.622    | No           | ns      | >0.9999          |
| 62                                                          | 0.05685    | -1.512 to 1.626    | No           | ns      | >0.9999          |
| 63                                                          | 0.1154     | -1.454 to 1.685    | No           | ns      | >0.9999          |
| 64                                                          | 0.1579     | -1.411 to 1.727    | No           | ns      | >0.9999          |
| 65                                                          | 0.1976     | -1.372 to 1.767    | No           | ns      | >0.9999          |
| 66                                                          | 0.2034     | -1.366 to 1.773    | No           | ns      | >0.9999          |
| 67                                                          | 0.3064     | -1.263 to 1.876    | No           | ns      | >0.9999          |
| 68                                                          | 0.5059     | -1.063 to 2.075    | No           | ns      | >0.9999          |
| 71                                                          | 1.499      | -0.07048 to 3.068  | No           | ns      | 0.0935           |
| 72                                                          | 1.663      | 0.09340 to 3.232   | No           | ns      | 0.207            |
| 73                                                          | 1.384      | -0.1854 to 2.953   | No           | ns      | 0.2346           |
| 74                                                          | 1.084      | -0.4849 to 2.654   | No           | ns      | 0.9295           |



|     |          |                   |     |    |         |
|-----|----------|-------------------|-----|----|---------|
| 75  | 1.143    | -0.4268 to 2.712  | No  | ns | 0.8280  |
| 76  | 1.106    | -0.4634 to 2.675  | No  | ns | 0.8981  |
| 77  | 1.355    | -0.2140 to 2.925  | No  | ns | 0.2878  |
| 78  | 1.853    | 0.2833 to 3.422   | Yes | ** | 0.0029  |
| 79  | 1.558    | -0.01083 to 3.128 | No  | ns | 0.0552  |
| 80  | 1.443    | -0.1268 to 3.012  | No  | ns | 0.1493  |
| 81  | 1.040    | -0.5289 to 2.610  | No  | ns | 0.9721  |
| 82  | 0.9768   | -0.5925 to 2.546  | No  | ns | 0.9956  |
| 83  | 0.5730   | -0.9963 to 2.142  | No  | ns | >0.9999 |
| 84  | 0.2178   | -1.352 to 1.787   | No  | ns | >0.9999 |
| 85  | 0.09842  | -1.471 to 1.668   | No  | ns | >0.9999 |
| 86  | 0.07445  | -1.495 to 1.644   | No  | ns | >0.9999 |
| 87  | 0.07285  | -1.496 to 1.642   | No  | ns | >0.9999 |
| 88  | 0.04062  | -1.529 to 1.610   | No  | ns | >0.9999 |
| 89  | 0.04402  | -1.525 to 1.613   | No  | ns | >0.9999 |
| 90  | 0.06403  | -1.505 to 1.633   | No  | ns | >0.9999 |
| 91  | 0.1190   | -1.450 to 1.688   | No  | ns | >0.9999 |
| 92  | 0.1667   | -1.403 to 1.736   | No  | ns | >0.9999 |
| 93  | 0.2036   | -1.366 to 1.773   | No  | ns | >0.9999 |
| 94  | 0.2328   | -1.337 to 1.802   | No  | ns | >0.9999 |
| 95  | 0.2515   | -1.318 to 1.821   | No  | ns | >0.9999 |
| 96  | 0.2559   | -1.313 to 1.825   | No  | ns | >0.9999 |
| 97  | 0.09010  | -1.479 to 1.659   | No  | ns | >0.9999 |
| 98  | -0.04817 | -1.617 to 1.521   | No  | ns | >0.9999 |
| 99  | -0.04390 | -1.613 to 1.525   | No  | ns | >0.9999 |
| 100 | 0.2482   | -1.321 to 1.818   | No  | ns | >0.9999 |
| 101 | 0.2960   | -1.273 to 1.865   | No  | ns | >0.9999 |
| 102 | 0.2943   | -1.275 to 1.864   | No  | ns | >0.9999 |
| 103 | 0.2991   | -1.270 to 1.868   | No  | ns | >0.9999 |
| 104 | 0.2596   | -1.310 to 1.829   | No  | ns | >0.9999 |
| 105 | 0.2179   | -1.351 to 1.787   | No  | ns | >0.9999 |
| 106 | 0.1703   | -1.399 to 1.740   | No  | ns | >0.9999 |
| 107 | 0.1356   | -1.434 to 1.705   | No  | ns | >0.9999 |
| 108 | 0.1081   | -1.461 to 1.677   | No  | ns | >0.9999 |
| 109 | 0.09800  | -1.471 to 1.667   | No  | ns | >0.9999 |
| 110 | 0.08167  | -1.488 to 1.651   | No  | ns | >0.9999 |
| 111 | 0.1226   | -1.447 to 1.692   | No  | ns | >0.9999 |
| 112 | 0.1433   | -1.426 to 1.713   | No  | ns | >0.9999 |
| 113 | 0.1239   | -1.445 to 1.693   | No  | ns | >0.9999 |
| 114 | 0.1017   | -1.468 to 1.671   | No  | ns | >0.9999 |
| 115 | 0.09857  | -1.471 to 1.668   | No  | ns | >0.9999 |
| 116 | 0.1169   | -1.452 to 1.686   | No  | ns | >0.9999 |
| 117 | 0.1326   | -1.437 to 1.702   | No  | ns | >0.9999 |
| 118 | 0.1560   | -1.413 to 1.725   | No  | ns | >0.9999 |
| 119 | 0.1954   | -1.374 to 1.765   | No  | ns | >0.9999 |
| 120 | 0.2262   | -1.343 to 1.795   | No  | ns | >0.9999 |
| 121 | 0.2807   | -1.289 to 1.850   | No  | ns | >0.9999 |
| 122 | 0.2631   | -1.306 to 1.832   | No  | ns | >0.9999 |
| 123 | 0.2266   | -1.343 to 1.796   | No  | ns | >0.9999 |
| 124 | 0.2003   | -1.369 to 1.770   | No  | ns | >0.9999 |
| 125 | 0.3811   | -1.188 to 1.950   | No  | ns | >0.9999 |
| 126 | 0.3791   | -1.190 to 1.948   | No  | ns | >0.9999 |
| 127 | 0.3244   | -1.245 to 1.894   | No  | ns | >0.9999 |
| 128 | 0.2923   | -1.277 to 1.862   | No  | ns | >0.9999 |
| 129 | 0.2453   | -1.324 to 1.815   | No  | ns | >0.9999 |
| 130 | 0.2129   | -1.356 to 1.782   | No  | ns | >0.9999 |
| 131 | 0.1849   | -1.384 to 1.754   | No  | ns | >0.9999 |
| 132 | 0.1594   | -1.410 to 1.729   | No  | ns | >0.9999 |
| 133 | 0.1386   | -1.431 to 1.708   | No  | ns | >0.9999 |
| 134 | 0.1484   | -1.421 to 1.718   | No  | ns | >0.9999 |
| 135 | 0.1306   | -1.439 to 1.700   | No  | ns | >0.9999 |
| 136 | 0.03127  | -1.538 to 1.601   | No  | ns | >0.9999 |



|     |           |                  |    |    |         |
|-----|-----------|------------------|----|----|---------|
| 137 | 0.1496    | -1.420 to 1.719  | No | ns | >0.9999 |
| 138 | 0.2176    | -1.352 to 1.787  | No | ns | >0.9999 |
| 139 | 0.2701    | -1.299 to 1.839  | No | ns | >0.9999 |
| 140 | 0.1339    | -1.435 to 1.703  | No | ns | >0.9999 |
| 141 | 0.09455   | -1.475 to 1.664  | No | ns | >0.9999 |
| 142 | -0.02252  | -1.592 to 1.547  | No | ns | >0.9999 |
| 143 | -0.1161   | -1.685 to 1.453  | No | ns | >0.9999 |
| 145 | 0.5314    | -1.038 to 2.101  | No | ns | >0.9999 |
| 146 | 0.8515    | -0.7178 to 2.421 | No | ns | >0.9999 |
| 147 | 1.087     | -0.4820 to 2.657 | No | ns | 0.9257  |
| 148 | 1.281     | -0.2884 to 2.850 | No | ns | 0.4617  |
| 149 | 0.4073    | -1.162 to 1.977  | No | ns | >0.9999 |
| 150 | 0.2902    | -1.279 to 1.860  | No | ns | >0.9999 |
| 151 | 0.2379    | -1.331 to 1.807  | No | ns | >0.9999 |
| 152 | 0.1059    | -1.463 to 1.675  | No | ns | >0.9999 |
| 153 | 0.04577   | -1.524 to 1.615  | No | ns | >0.9999 |
| 154 | -0.1927   | -1.762 to 1.377  | No | ns | >0.9999 |
| 155 | -0.1416   | -1.711 to 1.428  | No | ns | >0.9999 |
| 156 | -0.1053   | -1.675 to 1.464  | No | ns | >0.9999 |
| 157 | -0.1428   | -1.712 to 1.427  | No | ns | >0.9999 |
| 158 | 0.2225    | -1.347 to 1.792  | No | ns | >0.9999 |
| 159 | 0.4210    | -1.148 to 1.990  | No | ns | >0.9999 |
| 160 | 0.2989    | -1.270 to 1.868  | No | ns | >0.9999 |
| 161 | 0.3435    | -1.226 to 1.913  | No | ns | >0.9999 |
| 162 | 0.4896    | -1.080 to 2.059  | No | ns | >0.9999 |
| 163 | 0.4112    | -1.158 to 1.980  | No | ns | >0.9999 |
| 164 | 0.1765    | -1.393 to 1.746  | No | ns | >0.9999 |
| 165 | 0.02417   | -1.545 to 1.593  | No | ns | >0.9999 |
| 166 | 0.01922   | -1.550 to 1.589  | No | ns | >0.9999 |
| 167 | 0.1414    | -1.428 to 1.711  | No | ns | >0.9999 |
| 168 | 0.1849    | -1.384 to 1.754  | No | ns | >0.9999 |
| 169 | 0.1906    | -1.379 to 1.760  | No | ns | >0.9999 |
| 170 | 0.2266    | -1.343 to 1.796  | No | ns | >0.9999 |
| 171 | 0.2555    | -1.314 to 1.825  | No | ns | >0.9999 |
| 172 | 0.2866    | -1.283 to 1.856  | No | ns | >0.9999 |
| 173 | 0.2782    | -1.291 to 1.848  | No | ns | >0.9999 |
| 174 | 0.2838    | -1.286 to 1.853  | No | ns | >0.9999 |
| 175 | 0.3901    | -1.179 to 1.959  | No | ns | >0.9999 |
| 176 | 0.5244    | -1.045 to 2.094  | No | ns | >0.9999 |
| 177 | 0.5021    | -1.067 to 2.071  | No | ns | >0.9999 |
| 178 | 0.2040    | -1.365 to 1.773  | No | ns | >0.9999 |
| 179 | 0.1525    | -1.417 to 1.722  | No | ns | >0.9999 |
| 180 | 0.07663   | -1.493 to 1.646  | No | ns | >0.9999 |
| 181 | 0.1202    | -1.449 to 1.689  | No | ns | >0.9999 |
| 182 | -0.06235  | -1.632 to 1.507  | No | ns | >0.9999 |
| 183 | -0.1550   | -1.724 to 1.414  | No | ns | >0.9999 |
| 184 | 0.1200    | -1.449 to 1.689  | No | ns | >0.9999 |
| 185 | 0.3601    | -1.209 to 1.929  | No | ns | >0.9999 |
| 186 | 0.2735    | -1.296 to 1.843  | No | ns | >0.9999 |
| 187 | 0.06557   | -1.504 to 1.635  | No | ns | >0.9999 |
| 188 | -0.006367 | -1.576 to 1.563  | No | ns | >0.9999 |
| 189 | 0.1482    | -1.421 to 1.717  | No | ns | >0.9999 |
| 190 | 0.1683    | -1.401 to 1.738  | No | ns | >0.9999 |
| 191 | 0.2178    | -1.351 to 1.787  | No | ns | >0.9999 |
| 192 | 0.2063    | -1.363 to 1.776  | No | ns | >0.9999 |
| 193 | 0.1819    | -1.387 to 1.751  | No | ns | >0.9999 |
| 194 | 0.1470    | -1.422 to 1.716  | No | ns | >0.9999 |
| 195 | 0.1175    | -1.452 to 1.687  | No | ns | >0.9999 |
| 196 | 0.08248   | -1.487 to 1.652  | No | ns | >0.9999 |
| 197 | 0.05312   | -1.516 to 1.622  | No | ns | >0.9999 |
| 198 | -0.02153  | -1.591 to 1.548  | No | ns | >0.9999 |
| 199 | -0.02647  | -1.596 to 1.543  | No | ns | >0.9999 |

|     |           |                   |     |     |         |
|-----|-----------|-------------------|-----|-----|---------|
| 200 | -0.05638  | -1.626 to 1.513   | No  | ns  | >0.9999 |
| 201 | 0.01135   | -1.558 to 1.581   | No  | ns  | >0.9999 |
| 202 | 0.02795   | -1.541 to 1.597   | No  | ns  | >0.9999 |
| 203 | 0.06480   | -1.505 to 1.634   | No  | ns  | >0.9999 |
| 204 | 0.08737   | -1.482 to 1.657   | No  | ns  | >0.9999 |
| 205 | 0.1054    | -1.464 to 1.675   | No  | ns  | >0.9999 |
| 206 | 0.1315    | -1.438 to 1.701   | No  | ns  | >0.9999 |
| 207 | 0.1754    | -1.394 to 1.745   | No  | ns  | >0.9999 |
| 208 | 0.2154    | -1.354 to 1.785   | No  | ns  | >0.9999 |
| 209 | 0.2319    | -1.337 to 1.801   | No  | ns  | >0.9999 |
| 210 | 0.2664    | -1.303 to 1.836   | No  | ns  | >0.9999 |
| 211 | 0.1726    | -1.397 to 1.742   | No  | ns  | >0.9999 |
| 212 | 0.2060    | -1.363 to 1.775   | No  | ns  | >0.9999 |
| 213 | -0.009050 | -1.578 to 1.560   | No  | ns  | >0.9999 |
| 214 | 0.1831    | -1.386 to 1.752   | No  | ns  | >0.9999 |
| 215 | 0.1034    | -1.466 to 1.673   | No  | ns  | >0.9999 |
| 216 | 0.09808   | -1.471 to 1.667   | No  | ns  | >0.9999 |
| 217 | 0.1122    | -1.457 to 1.681   | No  | ns  | >0.9999 |
| 218 | 0.07728   | -1.492 to 1.647   | No  | ns  | >0.9999 |
| 219 | 0.04660   | -1.523 to 1.616   | No  | ns  | >0.9999 |
| 220 | 0.04433   | -1.525 to 1.614   | No  | ns  | >0.9999 |
| 221 | 0.06770   | -1.502 to 1.637   | No  | ns  | >0.9999 |
| 222 | 0.1077    | -1.462 to 1.677   | No  | ns  | >0.9999 |
| 223 | 0.1143    | -1.455 to 1.684   | No  | ns  | >0.9999 |
| 224 | 0.1089    | -1.460 to 1.678   | No  | ns  | >0.9999 |
| 225 | 0.07860   | -1.491 to 1.648   | No  | ns  | >0.9999 |
| 226 | 0.04960   | -1.520 to 1.619   | No  | ns  | >0.9999 |
| 227 | 0.03652   | -1.533 to 1.606   | No  | ns  | >0.9999 |
| 228 | 0.04048   | -1.529 to 1.610   | No  | ns  | >0.9999 |
| 229 | 0.04085   | -1.528 to 1.610   | No  | ns  | >0.9999 |
| 230 | 0.04428   | -1.525 to 1.614   | No  | ns  | >0.9999 |
| 231 | 0.04500   | -1.524 to 1.614   | No  | ns  | >0.9999 |
| 232 | 0.01142   | -1.558 to 1.581   | No  | ns  | >0.9999 |
| 233 | -0.04212  | -1.611 to 1.527   | No  | ns  | >0.9999 |
| 234 | -0.06228  | -1.632 to 1.507   | No  | ns  | >0.9999 |
| 235 | -0.06130  | -1.631 to 1.508   | No  | ns  | >0.9999 |
| 236 | 0.03678   | -1.533 to 1.606   | No  | ns  | >0.9999 |
| 237 | 0.06193   | -1.507 to 1.631   | No  | ns  | >0.9999 |
| 238 | 0.08870   | -1.481 to 1.658   | No  | ns  | >0.9999 |
| 239 | 0.1230    | -1.446 to 1.692   | No  | ns  | >0.9999 |
| 240 | 0.1599    | -1.409 to 1.729   | No  | ns  | >0.9999 |
| 241 | 0.1866    | -1.383 to 1.756   | No  | ns  | >0.9999 |
| 242 | 0.2026    | -1.367 to 1.772   | No  | ns  | >0.9999 |
| 243 | 0.1846    | -1.385 to 1.754   | No  | ns  | >0.9999 |
| 244 | 0.1943    | -1.375 to 1.764   | No  | ns  | >0.9999 |
| 245 | 0.2541    | -1.315 to 1.823   | No  | ns  | >0.9999 |
| 246 | 0.3629    | -1.206 to 1.932   | No  | ns  | >0.9999 |
| 247 | 0.2525    | -1.317 to 1.822   | No  | ns  | >0.9999 |
| 248 | 0.8441    | -0.7252 to 2.413  | No  | ns  | >0.9999 |
| 249 | 1.800     | 0.2307 to 3.369   | Yes | **  | 0.0051  |
| 250 | 1.981     | 0.4121 to 3.551   | Yes | *** | 0.0007  |
| 251 | 1.504     | -0.06485 to 3.074 | No  | ns  | 0.0890  |
| 252 | 1.468     | -0.1018 to 3.037  | No  | ns  | 0.1217  |
| 253 | 1.063     | -0.5060 to 2.633  | No  | ns  | 0.9534  |
| 254 | -0.1437   | -1.713 to 1.426   | No  | ns  | >0.9999 |
| 255 | -0.2500   | -1.819 to 1.319   | No  | ns  | >0.9999 |
| 256 | 0.03272   | -1.537 to 1.602   | No  | ns  | >0.9999 |
| 257 | -0.3874   | -1.957 to 1.182   | No  | ns  | >0.9999 |
| 258 | -0.4291   | -1.998 to 1.140   | No  | ns  | >0.9999 |
| 259 | -0.04410  | -1.613 to 1.525   | No  | ns  | >0.9999 |
| 260 | 0.5205    | -1.049 to 2.090   | No  | ns  | >0.9999 |
| 261 | 0.4462    | -1.123 to 2.016   | No  | ns  | >0.9999 |

|     |          |                 |    |    |         |
|-----|----------|-----------------|----|----|---------|
| 262 | 0.2288   | -1.340 to 1.798 | No | ns | >0.9999 |
| 263 | 0.2676   | -1.302 to 1.837 | No | ns | >0.9999 |
| 264 | 0.1012   | -1.468 to 1.670 | No | ns | >0.9999 |
| 265 | 0.1285   | -1.441 to 1.698 | No | ns | >0.9999 |
| 266 | 0.1797   | -1.390 to 1.749 | No | ns | >0.9999 |
| 267 | 0.2085   | -1.361 to 1.778 | No | ns | >0.9999 |
| 268 | 0.1588   | -1.411 to 1.728 | No | ns | >0.9999 |
| 269 | 0.1300   | -1.439 to 1.699 | No | ns | >0.9999 |
| 270 | 0.09563  | -1.474 to 1.665 | No | ns | >0.9999 |
| 271 | 0.08532  | -1.484 to 1.655 | No | ns | >0.9999 |
| 272 | 0.05353  | -1.516 to 1.623 | No | ns | >0.9999 |
| 273 | 0.05000  | -1.519 to 1.619 | No | ns | >0.9999 |
| 274 | 0.06108  | -1.508 to 1.630 | No | ns | >0.9999 |
| 275 | 0.06670  | -1.503 to 1.636 | No | ns | >0.9999 |
| 276 | 0.07000  | -1.499 to 1.639 | No | ns | >0.9999 |
| 277 | 0.08763  | -1.482 to 1.657 | No | ns | >0.9999 |
| 278 | 0.09057  | -1.479 to 1.660 | No | ns | >0.9999 |
| 279 | 0.1078   | -1.461 to 1.677 | No | ns | >0.9999 |
| 280 | 0.1234   | -1.446 to 1.693 | No | ns | >0.9999 |
| 281 | 0.1413   | -1.428 to 1.711 | No | ns | >0.9999 |
| 282 | 0.1514   | -1.418 to 1.721 | No | ns | >0.9999 |
| 283 | 0.1191   | -1.450 to 1.688 | No | ns | >0.9999 |
| 284 | 0.07558  | -1.494 to 1.645 | No | ns | >0.9999 |
| 285 | 0.07423  | -1.495 to 1.644 | No | ns | >0.9999 |
| 286 | 0.07518  | -1.494 to 1.644 | No | ns | >0.9999 |
| 287 | 0.1054   | -1.464 to 1.675 | No | ns | >0.9999 |
| 288 | 0.1002   | -1.469 to 1.670 | No | ns | >0.9999 |
| 289 | 0.08975  | -1.480 to 1.659 | No | ns | >0.9999 |
| 290 | 0.07340  | -1.496 to 1.643 | No | ns | >0.9999 |
| 291 | 0.05165  | -1.518 to 1.621 | No | ns | >0.9999 |
| 292 | 0.04182  | -1.527 to 1.611 | No | ns | >0.9999 |
| 293 | 0.01907  | -1.550 to 1.588 | No | ns | >0.9999 |
| 294 | 0.004067 | -1.565 to 1.573 | No | ns | >0.9999 |
| 295 | -0.01487 | -1.584 to 1.554 | No | ns | >0.9999 |
| 296 | -0.02013 | -1.589 to 1.549 | No | ns | >0.9999 |

**Table S2.** Statistical analysis of RMSF plots from wt and B.1.1.7 spike protein residues 800-900 (n = 6; two-way ANOVA; significance assumed for \*p<0.05).

| Compare each cell mean with the other cell mean in that row |            |                    |              |         |                  |
|-------------------------------------------------------------|------------|--------------------|--------------|---------|------------------|
| Number of families                                          | 1          |                    |              |         |                  |
| Number of comparisons per family                            | 100        |                    |              |         |                  |
| Alpha                                                       | 0.05       |                    |              |         |                  |
| Sidak's multiple comparisons test                           | Mean Diff, | 95,00% CI of diff, | Significant? | Summary | Adjusted P Value |
| residue number                                              |            |                    |              |         |                  |
| 800                                                         | -0.1280    | -1.995 to 1.739    | No           | ns      | >0.9999          |
| 801                                                         | -0.2166    | -2.084 to 1.650    | No           | ns      | >0.9999          |
| 802                                                         | -0.2190    | -2.086 to 1.648    | No           | ns      | >0.9999          |
| 803                                                         | -0.2493    | -2.116 to 1.618    | No           | ns      | >0.9999          |
| 804                                                         | -0.3069    | -2.174 to 1.560    | No           | ns      | >0.9999          |
| 805                                                         | -0.2610    | -2.128 to 1.606    | No           | ns      | >0.9999          |
| 806                                                         | -0.2261    | -2.093 to 1.641    | No           | ns      | >0.9999          |
| 807                                                         | -0.1018    | -1.969 to 1.765    | No           | ns      | >0.9999          |
| 808                                                         | 0.06743    | -1.799 to 1.934    | No           | ns      | >0.9999          |
| 809                                                         | -0.04395   | -1.911 to 1.823    | No           | ns      | >0.9999          |
| 810                                                         | -0.1864    | -2.053 to 1.681    | No           | ns      | >0.9999          |
| 811                                                         | -0.2875    | -2.154 to 1.579    | No           | ns      | >0.9999          |
| 812                                                         | -0.3187    | -2.186 to 1.548    | No           | ns      | >0.9999          |
| 813                                                         | -0.4475    | -2.314 to 1.419    | No           | ns      | >0.9999          |
| 814                                                         | -0.3771    | -2.244 to 1.490    | No           | ns      | >0.9999          |
| 815                                                         | -0.3110    | -2.178 to 1.556    | No           | ns      | >0.9999          |
| 816                                                         | -0.2772    | -2.144 to 1.590    | No           | ns      | >0.9999          |
| 817                                                         | -0.2562    | -2.123 to 1.611    | No           | ns      | >0.9999          |
| 818                                                         | -0.2571    | -2.124 to 1.610    | No           | ns      | >0.9999          |
| 819                                                         | -0.2522    | -2.119 to 1.615    | No           | ns      | >0.9999          |
| 820                                                         | -0.2137    | -2.081 to 1.653    | No           | ns      | >0.9999          |
| 821                                                         | -0.2046    | -2.071 to 1.662    | No           | ns      | >0.9999          |
| 822                                                         | -0.1648    | -2.032 to 1.702    | No           | ns      | >0.9999          |
| 823                                                         | -0.2029    | -2.070 to 1.664    | No           | ns      | >0.9999          |
| 824                                                         | -0.2830    | -2.150 to 1.584    | No           | ns      | >0.9999          |
| 825                                                         | -0.3213    | -2.188 to 1.546    | No           | ns      | >0.9999          |
| 826                                                         | -0.1972    | -2.064 to 1.670    | No           | ns      | >0.9999          |
| 827                                                         | -0.3541    | -2.221 to 1.513    | No           | ns      | >0.9999          |
| 828                                                         | -0.4093    | -2.276 to 1.458    | No           | ns      | >0.9999          |
| 829                                                         | -0.9103    | -2.777 to 0.9567   | No           | ns      | >0.9999          |
| 830                                                         | -1.089     | -2.956 to 0.7779   | No           | ns      | 0.9862           |
| 831                                                         | -1.212     | -3.079 to 0.6549   | No           | ns      | 0.9084           |
| 832                                                         | -1.656     | -3.522 to 0.2113   | No           | ns      | 0.1845           |
| 833                                                         | -1.782     | -3.649 to 0.08476  | No           | ns      | 0.0867           |
| 834                                                         | -1.768     | -3.635 to 0.09891  | No           | ns      | 0.0947           |
| 835                                                         | -2.051     | -3.918 to -0.1844  | Yes          | *       | 0.0137           |
| 836                                                         | -2.291     | -4.158 to -0.4240  | Yes          | **      | 0.0021           |
| 837                                                         | -2.393     | -4.260 to -0.5262  | Yes          | ***     | 0.0009           |
| 838                                                         | -2.537     | -4.404 to -0.6704  | Yes          | ***     | 0.0003           |
| 839                                                         | -1.878     | -3.745 to -0.01122 | Yes          | *       | 0.0464           |
| 840                                                         | -2.151     | -4.017 to -0.2836  | Yes          | **      | 0.0065           |
| 841                                                         | -2.035     | -3.902 to -0.1686  | Yes          | *       | 0.0154           |
| 842                                                         | -2.393     | -4.260 to -0.5264  | Yes          | ***     | 0.0009           |
| 843                                                         | -2.179     | -4.046 to -0.3123  | Yes          | **      | 0.0052           |
| 844                                                         | -1.754     | -3.620 to 0.1133   | No           | ns      | 0.1036           |
| 845                                                         | -1.753     | -3.620 to 0.1140   | No           | ns      | 0.1040           |
| 846                                                         | -1.470     | -3.337 to 0.3967   | No           | ns      | 0.4579           |
| 847                                                         | -1.228     | -3.095 to 0.6391   | No           | ns      | 0.8905           |
| 848                                                         | -1.048     | -2.915 to 0.8192   | No           | ns      | 0.9942           |
| 849                                                         | -0.9947    | -2.862 to 0.8722   | No           | ns      | 0.9985           |

|     |          |                  |    |    |         |
|-----|----------|------------------|----|----|---------|
| 850 | -0.7876  | -2.654 to 1.079  | No | ns | >0.9999 |
| 851 | -1.005   | -2.872 to 0.8620 | No | ns | 0.9980  |
| 852 | -0.8561  | -2.723 to 1.011  | No | ns | >0.9999 |
| 853 | -0.5983  | -2.465 to 1.269  | No | ns | >0.9999 |
| 854 | -0.3093  | -2.176 to 1.558  | No | ns | >0.9999 |
| 855 | -0.04725 | -1.914 to 1.820  | No | ns | >0.9999 |
| 856 | -0.07502 | -1.942 to 1.792  | No | ns | >0.9999 |
| 857 | -0.1309  | -1.998 to 1.736  | No | ns | >0.9999 |
| 858 | -0.1545  | -2.021 to 1.712  | No | ns | >0.9999 |
| 859 | -0.2139  | -2.081 to 1.653  | No | ns | >0.9999 |
| 860 | -0.2246  | -2.091 to 1.642  | No | ns | >0.9999 |
| 861 | -0.2097  | -2.077 to 1.657  | No | ns | >0.9999 |
| 862 | -0.2924  | -2.159 to 1.575  | No | ns | >0.9999 |
| 863 | -0.3368  | -2.204 to 1.530  | No | ns | >0.9999 |
| 864 | -0.3380  | -2.205 to 1.529  | No | ns | >0.9999 |
| 865 | -0.3322  | -2.199 to 1.535  | No | ns | >0.9999 |
| 866 | -0.2914  | -2.158 to 1.576  | No | ns | >0.9999 |
| 867 | -0.3157  | -2.183 to 1.551  | No | ns | >0.9999 |
| 868 | -0.3822  | -2.249 to 1.485  | No | ns | >0.9999 |
| 869 | -0.3861  | -2.253 to 1.481  | No | ns | >0.9999 |
| 870 | -0.3807  | -2.248 to 1.486  | No | ns | >0.9999 |
| 871 | -0.3803  | -2.247 to 1.487  | No | ns | >0.9999 |
| 872 | -0.3900  | -2.257 to 1.477  | No | ns | >0.9999 |
| 873 | -0.4014  | -2.268 to 1.466  | No | ns | >0.9999 |
| 874 | -0.3739  | -2.241 to 1.493  | No | ns | >0.9999 |
| 875 | -0.3471  | -2.214 to 1.520  | No | ns | >0.9999 |
| 876 | -0.3396  | -2.206 to 1.527  | No | ns | >0.9999 |
| 877 | -0.3380  | -2.205 to 1.529  | No | ns | >0.9999 |
| 878 | -0.3264  | -2.193 to 1.540  | No | ns | >0.9999 |
| 879 | -0.2904  | -2.157 to 1.576  | No | ns | >0.9999 |
| 880 | -0.2508  | -2.118 to 1.616  | No | ns | >0.9999 |
| 881 | -0.2283  | -2.095 to 1.639  | No | ns | >0.9999 |
| 882 | -0.1984  | -2.065 to 1.669  | No | ns | >0.9999 |
| 883 | -0.1742  | -2.041 to 1.693  | No | ns | >0.9999 |
| 884 | -0.1965  | -2.063 to 1.670  | No | ns | >0.9999 |
| 885 | -0.08338 | -1.950 to 1.784  | No | ns | >0.9999 |
| 886 | -0.2021  | -2.069 to 1.665  | No | ns | >0.9999 |
| 887 | -0.3500  | -2.217 to 1.517  | No | ns | >0.9999 |
| 888 | -0.4662  | -2.333 to 1.401  | No | ns | >0.9999 |
| 889 | -0.5197  | -2.387 to 1.347  | No | ns | >0.9999 |
| 890 | -0.3981  | -2.265 to 1.469  | No | ns | >0.9999 |
| 891 | -0.3144  | -2.181 to 1.552  | No | ns | >0.9999 |
| 892 | -0.1745  | -2.041 to 1.692  | No | ns | >0.9999 |
| 893 | -0.1717  | -2.039 to 1.695  | No | ns | >0.9999 |
| 894 | -0.1517  | -2.019 to 1.715  | No | ns | >0.9999 |
| 895 | -0.1323  | -1.999 to 1.735  | No | ns | >0.9999 |
| 896 | -0.1209  | -1.988 to 1.746  | No | ns | >0.9999 |
| 897 | -0.1356  | -2.002 to 1.731  | No | ns | >0.9999 |
| 898 | -0.1097  | -1.977 to 1.757  | No | ns | >0.9999 |
| 899 | -0.09742 | -1.964 to 1.769  | No | ns | >0.9999 |



**Table S3.** Statistical analysis of contacts between residues from the receptor binding domain and ACE2 from wt and B.1.1.7 (n = 4; two-way ANOVA; significance assumed for \*p<0.05).

| Compare each cell mean with the other cell mean in that row |            |                    |              |         |                  |
|-------------------------------------------------------------|------------|--------------------|--------------|---------|------------------|
| Number of families                                          | 1          |                    |              |         |                  |
| Number of comparisons per family                            | 39         |                    |              |         |                  |
| Alpha                                                       | 0.05       |                    |              |         |                  |
| Sidak's multiple comparisons test                           | Mean Diff, | 95,00% CI of diff, | Significant? | Summary | Adjusted P Value |
| wt - B.1.1.7                                                |            |                    |              |         |                  |
| Gln24-Ala475                                                | -3.966     | -36.71 to 28.77    | No           | ns      | >0.9999          |
| Gln24-Gly476                                                | -6.900     | -60.96 to 47.16    | No           | ns      | >0.9999          |
| Gln24-Phe486                                                | -4.431     | -56.96 to 48.10    | No           | ns      | >0.9999          |
| Gln24-Asn487                                                | -3.633     | -39.32 to 32.06    | No           | ns      | >0.9999          |
| Gln24-Tyr489                                                | 1.424      | -27.42 to 30.27    | No           | ns      | >0.9999          |
| Thr27-Phe456                                                | -27.09     | -227.5 to 173.3    | No           | ns      | >0.9999          |
| Thr27-Tyr473                                                | -1.580     | -11.80 to 8.639    | No           | ns      | >0.9999          |
| Thr27-Ala475                                                | -0.2872    | -16.29 to 15.71    | No           | ns      | >0.9999          |
| Thr27-Tyr489                                                | -0.2933    | -39.37 to 38.78    | No           | ns      | >0.9999          |
| Asp30-Lys417                                                | -2.107     | -40.08 to 35.86    | No           | ns      | >0.9999          |
| Asp30-Leu455                                                | 1.832      | -37.21 to 40.87    | No           | ns      | >0.9999          |
| Asp30-Phe456                                                | -1.802     | -4.475 to 0.8716   | No           | ns      | 0.2915           |
| Lys31-Leu455                                                | 3.215      | -27.90 to 34.33    | No           | ns      | >0.9999          |
| Lys31-Phe456                                                | -0.2198    | -13.34 to 12.90    | No           | ns      | >0.9999          |
| Lys31-Tyr489                                                | -1.140     | -42.64 to 40.36    | No           | ns      | >0.9999          |
| Lys31-Phe490                                                | 0.2721     | -34.14 to 34.69    | No           | ns      | >0.9999          |
| Lys31-Gln493                                                | 5.029      | -20.40 to 30.46    | No           | ns      | >0.9999          |
| His34-Tyr453                                                | 7.590      | -23.02 to 38.20    | No           | ns      | 0.9928           |
| His34-Leu455                                                | -1.827     | -86.36 to 82.71    | No           | ns      | >0.9999          |
| His34-Gln493                                                | -4.108     | -30.22 to 22.00    | No           | ns      | >0.9999          |
| His34-Tyr495                                                | 6.822      | -47.09 to 60.73    | No           | ns      | >0.9999          |
| Glu35-Gln493                                                | 3.989      | -13.29 to 21.27    | No           | ns      | >0.9999          |
| Glu37-Tyr505                                                | 6.696      | -12.10 to 25.49    | No           | ns      | 0.7336           |
| Asp38-Tyr449                                                | 20.14      | 4.753 to 35.52     | Yes          | *       | 0.0201           |
| Asp38-Gln498                                                | 16.06      | -8.407 to 40.52    | No           | ns      | 0.1612           |
| Tyr41-Gln498                                                | 24.73      | 3.697 to 45.76     | Yes          | *       | 0.0260           |
| Tyr41-Thr500                                                | 5.704      | -5.204 to 16.61    | No           | ns      | 0.6281           |
| Tyr41-Asn/Tyr501                                            | -1.294     | -19.15 to 16.56    | No           | ns      | >0.9999          |
| Leu79-Val483                                                | 4.129      | -27.98 to 36.24    | No           | ns      | >0.9999          |
| Leu79-Gly485                                                | 3.031      | -22.75 to 28.81    | No           | ns      | >0.9999          |
| Leu79-Phe486                                                | -1.775     | -19.09 to 15.54    | No           | ns      | >0.9999          |
| Lys353-Gly496                                               | 15.10      | 8.848 to 21.35     | Yes          | ***     | 0.0004           |
| Lys353-Phe497                                               | 15.54      | 2.414 to 28.68     | Yes          | *       | 0.0307           |
| Lys353-Gln498                                               | 43.86      | 41.70 to 46.03     | Yes          | ****    | <0.0001          |
| Lys353-Asn/Tyr501                                           | -31.08     | -36.95 to -25.21   | Yes          | ****    | <0.0001          |
| Lys353-Gly502                                               | 0.1488     | -1.268 to 1.566    | No           | ns      | >0.9999          |
| Lys353-Tyr505                                               | 5.197      | -14.64 to 25.03    | No           | ns      | 0.9954           |
| Gly354-Tyr505                                               | 5.532      | -31.56 to 42.62    | No           | ns      | 0.9998           |
| Ala387-Tyr505                                               | 4.640      | -44.51 to 53.80    | No           | ns      | >0.9999          |

**Table S4.** Statistical analysis of electrostatic interaction energy of residues from the receptor binding domain comparing wt and B.1.1.7 (n = 4; two-way ANOVA; significance assumed for \*p<0.05).

| Compare each cell mean with the other cell mean in that row |            |                    |              |         |                  |
|-------------------------------------------------------------|------------|--------------------|--------------|---------|------------------|
| Number of families                                          | 1          |                    |              |         |                  |
| Number of comparisons per family                            | 18         |                    |              |         |                  |
| Alpha                                                       | 0.05       |                    |              |         |                  |
| Sidak's multiple comparisons test                           | Mean Diff, | 95,00% CI of diff, | Significant? | Summary | Adjusted P Value |
| electrostatic wt - electrostatic B.1.1.7                    |            |                    |              |         |                  |
| Lys417                                                      | 2.002      | -7.629 to 11.63    | No           | ns      | >0.9999          |
| Tyr449                                                      | -9.196     | -18.83 to 0.4345   | No           | ns      | 0.0737           |
| Tyr453                                                      | -0.8195    | -10.45 to 8.811    | No           | ns      | >0.9999          |
| Leu455                                                      | -0.04517   | -9.676 to 9.585    | No           | ns      | >0.9999          |
| Phe456                                                      | 0.2792     | -9.351 to 9.909    | No           | ns      | >0.9999          |
| Tyr473                                                      | 0.2544     | -9.376 to 9.885    | No           | ns      | >0.9999          |
| Ala475                                                      | 0.6749     | -8.955 to 10.31    | No           | ns      | >0.9999          |
| Gly476                                                      | 0.7864     | -8.844 to 10.42    | No           | ns      | >0.9999          |
| Phe486                                                      | 0.01221    | -9.618 to 9.643    | No           | ns      | >0.9999          |
| Asn487                                                      | 0.3207     | -9.310 to 9.951    | No           | ns      | >0.9999          |
| Tyr489                                                      | 0.06032    | -9.570 to 9.691    | No           | ns      | >0.9999          |
| Gln493                                                      | 4.088      | -5.543 to 13.72    | No           | ns      | 0.9775           |
| Gly496                                                      | -8.394     | -18.02 to 1.236    | No           | ns      | 0.1446           |
| Gln498                                                      | -18.40     | -28.03 to -8.771   | Yes          | ****    | <0.0001          |
| Thr500                                                      | 0.4097     | -9.221 to 10.04    | No           | ns      | >0.9999          |
| Asn/Tyr501                                                  | -6.797     | -16.43 to 2.833    | No           | ns      | 0.4389           |
| Gly502                                                      | -2.077     | -11.71 to 7.553    | No           | ns      | >0.9999          |
| Tyr505                                                      | -1.129     | -10.76 to 8.502    | No           | ns      | >0.9999          |

**Table S5.** Statistical analysis of electrostatic interaction energy of residues from ACE2 comparing wt and B.1.1.7 (n = 4; two-way ANOVA; significance assumed for \*p<0.05).

| Compare each cell mean with the other cell mean in that row |            |                    |              |         |                  |
|-------------------------------------------------------------|------------|--------------------|--------------|---------|------------------|
| Number of families                                          | 1          |                    |              |         |                  |
| Number of comparisons per family                            | 17         |                    |              |         |                  |
| Alpha                                                       | 0.05       |                    |              |         |                  |
| Sidak's multiple comparisons test                           | Mean Diff, | 95,00% CI of diff, | Significant? | Summary | Adjusted P Value |
| electrostatic wt - electrostatic B.1.1.7                    |            |                    |              |         |                  |
| Gln24                                                       | 1.291      | -8.879 to 11.46    | No           | ns      | >0.9999          |
| Thr27                                                       | 0.08892    | -10.08 to 10.26    | No           | ns      | >0.9999          |
| Phe28                                                       | 0.09204    | -10.08 to 10.26    | No           | ns      | >0.9999          |
| Asp30                                                       | 4.740      | -5.430 to 14.91    | No           | ns      | 0.9401           |
| Lys31                                                       | 0.3279     | -9.841 to 10.50    | No           | ns      | >0.9999          |
| His34                                                       | -4.305     | -14.47 to 5.864    | No           | ns      | 0.9740           |
| Glu35                                                       | -1.158     | -11.33 to 9.011    | No           | ns      | >0.9999          |
| Asp38                                                       | -8.984     | -19.15 to 1.185    | No           | ns      | 0.1303           |
| Tyr41                                                       | -1.274     | -11.44 to 8.895    | No           | ns      | >0.9999          |
| Gln42                                                       | -1.510     | -11.68 to 8.659    | No           | ns      | >0.9999          |
| Met82                                                       | 0.008097   | -10.16 to 10.18    | No           | ns      | >0.9999          |
| Tyr83                                                       | -0.6152    | -10.78 to 9.554    | No           | ns      | >0.9999          |
| Asn330                                                      | 0.7600     | -9.409 to 10.93    | No           | ns      | >0.9999          |
| Lys353                                                      | -28.08     | -38.25 to -17.91   | Yes          | ****    | <0.0001          |
| Gly354                                                      | -0.5079    | -10.68 to 9.661    | No           | ns      | >0.9999          |
| Asp355                                                      | -0.8822    | -11.05 to 9.287    | No           | ns      | >0.9999          |
| Arg357                                                      | 0.2824     | -9.887 to 10.45    | No           | ns      | >0.9999          |

**Table S6.** Statistical analysis of van der Waals interaction energy of residues from the receptor binding domain comparing wt and B.1.1.7 (n = 4; two-way ANOVA; significance assumed for \*p<0.05).

| Compare each cell mean with the other cell mean in that row |            |                    |              |         |                  |
|-------------------------------------------------------------|------------|--------------------|--------------|---------|------------------|
| Number of families                                          | 1          |                    |              |         |                  |
| Number of comparisons per family                            | 18         |                    |              |         |                  |
| Alpha                                                       | 0.05       |                    |              |         |                  |
| Sidak's multiple comparisons test                           | Mean Diff, | 95,00% CI of diff, | Significant? | Summary | Adjusted P Value |
| VdW wt - VdW B.1.1.7                                        |            |                    |              |         |                  |
| Lys417                                                      | -0.1159    | -0.8238 to 0.5920  | No           | ns      | 0.9996           |
| Tyr449                                                      | -0.5646    | -1.674 to 0.5452   | No           | ns      | 0.5767           |
| Tyr453                                                      | -0.1531    | -0.6207 to 0.3144  | No           | ns      | 0.9561           |
| Leu455                                                      | -0.1551    | -0.9608 to 0.6506  | No           | ns      | 0.9995           |
| Phe456                                                      | 0.2132     | -0.4923 to 0.9186  | No           | ns      | 0.8694           |
| Tyr473                                                      | 0.1292     | -0.9458 to 1.204   | No           | ns      | >0.9999          |
| Ala475                                                      | 0.2620     | -2.877 to 3.401    | No           | ns      | >0.9999          |
| Gly476                                                      | 0.4282     | -4.984 to 5.840    | No           | ns      | >0.9999          |
| Phe486                                                      | -0.04765   | -0.6225 to 0.5272  | No           | ns      | >0.9999          |
| Asn487                                                      | 0.1392     | -0.6292 to 0.9076  | No           | ns      | 0.9978           |
| Tyr489                                                      | -0.02050   | -0.9177 to 0.8767  | No           | ns      | >0.9999          |
| Gln493                                                      | -0.2753    | -1.040 to 0.4894   | No           | ns      | 0.8832           |
| Gly496                                                      | -0.2742    | -0.7783 to 0.2299  | No           | ns      | 0.4956           |
| Gln498                                                      | -1.555     | -2.501 to -0.6099  | Yes          | **      | 0.0039           |
| Thr500                                                      | -0.1012    | -0.8328 to 0.6305  | No           | ns      | >0.9999          |
| Asn/Tyr501                                                  | 1.917      | 1.276 to 2.559     | Yes          | ***     | 0.0001           |
| Gly502                                                      | 0.1328     | -0.2838 to 0.5493  | No           | ns      | 0.7502           |
| Tyr505                                                      | -0.8373    | -3.986 to 2.311    | No           | ns      | 0.9887           |

**Table S7.** Statistical analysis of electrostatic interaction energy of residues from ACE2 comparing wt and B.1.1.7 (n = 4; two-way ANOVA; significance assumed for \*p<0.05).

| Compare each cell mean with the other cell mean in that row |            |                    |              |         |                  |
|-------------------------------------------------------------|------------|--------------------|--------------|---------|------------------|
| Number of families                                          | 1          |                    |              |         |                  |
| Number of comparisons per family                            | 17         |                    |              |         |                  |
| Alpha                                                       | 0.05       |                    |              |         |                  |
| Sidak's multiple comparisons test                           | Mean Diff, | 95,00% CI of diff, | Significant? | Summary | Adjusted P Value |
| electrostatic wt - electrostatic B.1.1.7                    |            |                    |              |         |                  |
| Gln24                                                       | 0.3199     | -2.765 to 3.405    | No           | ns      | >0.9999          |
| Thr27                                                       | 0.2025     | -0.8693 to 1.274   | No           | ns      | 0.9924           |
| Phe28                                                       | -0.08288   | -1.123 to 0.9569   | No           | ns      | >0.9999          |
| Asp30                                                       | -0.1104    | -0.4978 to 0.2770  | No           | ns      | 0.9745           |
| Lys31                                                       | -0.04280   | -1.378 to 1.292    | No           | ns      | >0.9999          |
| His34                                                       | -0.5685    | -1.175 to 0.03814  | No           | ns      | 0.0651           |
| Glu35                                                       | -0.5276    | -1.109 to 0.05356  | No           | ns      | 0.0772           |
| Asp38                                                       | -0.7532    | -2.592 to 1.086    | No           | ns      | 0.6362           |
| Tyr41                                                       | -1.162     | -2.035 to -0.2886  | Yes          | *       | 0.0191           |
| Gln42                                                       | -0.9193    | -1.665 to -0.1739  | Yes          | *       | 0.0184           |
| Met82                                                       | -0.1952    | -1.267 to 0.8763   | No           | ns      | 0.9934           |
| Tyr83                                                       | -0.07057   | -0.8227 to 0.6816  | No           | ns      | >0.9999          |
| Asn330                                                      | 0.1921     | -0.4348 to 0.8190  | No           | ns      | 0.9457           |
| Lys353                                                      | 0.4709     | -2.538 to 3.480    | No           | ns      | 0.9951           |
| Gly354                                                      | 0.007700   | -0.6917 to 0.7071  | No           | ns      | >0.9999          |
| Asp355                                                      | 0.1154     | -0.3833 to 0.6140  | No           | ns      | 0.9726           |
| Arg357                                                      | 0.1624     | -0.1969 to 0.5216  | No           | ns      | 0.6094           |
